# Supplementary material
Source: PubMed Central journal article supplement (PMC4280065)
Supplement: NIHMS527421-supplement-1.pdf [file NIHMS527421-supplement-1.pdf]

| Table 1. ACT clinical trial tumor responses and toxicities. <sup>a</sup> |                                                    |               |                                                        |                                                                              |
|--------------------------------------------------------------------------|----------------------------------------------------|---------------|--------------------------------------------------------|------------------------------------------------------------------------------|
| Target antigen                                                           | Cancer(s)                                          | Receptor type | Tumor responses (patients responding/patients treated) | Immune-mediated toxicities (patients experiencing toxicity/patients treated) |
| gp100                                                                    | Melanoma                                           | TCR           | 3/16 <sup>1</sup>                                      | Skin rash (15/16)<br>Uveitis (4/16)<br>Hearing impairment (5/16)             |
| MART1                                                                    | Melanoma                                           | TCR           | 6/20 <sup>1</sup>                                      | Skin rash (14/20)<br>Uveitis (11/20)<br>Hearing impairment (10/20)           |
| CEA                                                                      | Colon cancer                                       | TCR           | 1/3 <sup>2</sup>                                       | Colitis (3/3)                                                                |
| CAIX                                                                     | Renal cell carcinoma                               | CAR           | 0/8 <sup>3,4</sup>                                     | Hepatotoxicity (4/8) <sup>b</sup>                                            |
| HER2/Neu                                                                 | Colon cancer                                       | CAR           | 0/1 <sup>5</sup>                                       | Cytokine release syndrome (1/1)                                              |
| MAGE-A3/A9/A12 <sup>c</sup>                                              | Melanoma, synovial cell sarcoma, esophageal cancer | TCR           | 5/9 <sup>6</sup>                                       | Central nervous system toxicities (4/9)                                      |
| MAGE-A3/titin <sup>d</sup>                                               | Multiple myeloma, melanoma                         | TCR           | 0/2 <sup>7</sup>                                       | Cardiac toxicity (2/2)                                                       |
| CD19                                                                     | B-cell malignancies                                | CAR           | 6/8 <sup>8</sup>                                       | Prolonged B cell deficiency (4/8)<br>Cytokine release syndrome (4/8)         |
|                                                                          |                                                    |               | 3/3 <sup>9,10</sup>                                    | Prolonged B cell deficiency (3/3)                                            |
|                                                                          |                                                    |               | 2/2 <sup>11</sup>                                      | Prolonged B cell deficiency (2/2)<br>Cytokine release syndrome (2/2)         |
|                                                                          |                                                    |               | 2/2 <sup>12</sup>                                      | Cytokine release syndrome (2/2)                                              |
| GD2                                                                      | Neuroblastoma                                      | CAR           | 1/7 <sup>13</sup>                                      | None                                                                         |
| NY-ESO-1                                                                 | Synovial cell sarcoma, melanoma                    | TCR           | 9/17 <sup>14</sup>                                     | None                                                                         |

<sup>a</sup> Antigen receptor gene therapy trials in which regression of bulky tumors or autoimmune toxicities occurred.

<sup>b</sup> All patients had at least grade 1 and four patients had grade 3 or 4 liver enzyme elevations.

<sup>c</sup> The MAGE-A3-specific TCR targeted an epitope shared by MAGE-A3 and MAGE-A9 and had cross-reactivity against an epitope of MAGE-A12.

<sup>d</sup> The MAGE-A3-specific TCR was cross-reactive against an epitope of titin.

| Table 2. Rationally selected candidate target antigens for ACT.              |                          |                          |                                           |                                                 |                                                                                                |
|------------------------------------------------------------------------------|--------------------------|--------------------------|-------------------------------------------|-------------------------------------------------|------------------------------------------------------------------------------------------------|
| Antigen                                                                      | Tumor type               | Expression frequency (%) | Healthy tissue expression                 | Advantages                                      | Disadvantages                                                                                  |
| Cancer testis antigens (testis-restricted or tissue-restricted) <sup>a</sup> |                          |                          |                                           |                                                 |                                                                                                |
| CTAG1B                                                                       | Myeloma                  | 7-36                     | Germ cells <sup>15</sup>                  | Multiple tumor types, many potential epitopes   | MHC restricted, tissue restriction uncertain, frequency and intensity of positive cells varies |
|                                                                              | Adult T-cell leukemia    | 61                       |                                           |                                                 |                                                                                                |
|                                                                              | Transitional cell        | 35-45                    |                                           |                                                 |                                                                                                |
|                                                                              | Medulloblastoma          | 20                       |                                           |                                                 |                                                                                                |
|                                                                              | Esophageal squamous cell | 41                       |                                           |                                                 |                                                                                                |
|                                                                              | Oral squamous cell       | 28                       |                                           |                                                 |                                                                                                |
|                                                                              | Hepatocellular           | 1-44                     |                                           |                                                 |                                                                                                |
|                                                                              | Non-small cell lung      | 2-33                     |                                           |                                                 |                                                                                                |
|                                                                              | Melanoma                 | 0-71                     |                                           |                                                 |                                                                                                |
|                                                                              | Ovarian                  | 10-30                    |                                           |                                                 |                                                                                                |
| MAGEA1                                                                       | Myeloma                  | 20-52                    |                                           |                                                 |                                                                                                |
|                                                                              | Transitional cell        | 57                       |                                           |                                                 |                                                                                                |
|                                                                              | Glioblastoma             | 0-40                     |                                           |                                                 |                                                                                                |
|                                                                              | Head and neck            | 10-30                    |                                           |                                                 |                                                                                                |
|                                                                              | Hepatocellular           | 46-80                    |                                           |                                                 |                                                                                                |
|                                                                              | Non-small cell lung      | 10-70                    |                                           |                                                 |                                                                                                |
|                                                                              | Melanoma                 | 16-90                    |                                           |                                                 |                                                                                                |
|                                                                              | Neuroblastoma            | 36                       |                                           |                                                 |                                                                                                |
| Serous ovarian                                                               | 42                       |                          |                                           |                                                 |                                                                                                |
| MAGE-C1                                                                      | Myeloma                  | 30-77                    |                                           |                                                 |                                                                                                |
|                                                                              | Medulloblastoma          | 28                       |                                           |                                                 |                                                                                                |
|                                                                              | Hepatocellular           | 48                       |                                           |                                                 |                                                                                                |
|                                                                              | Non-small cell lung      | 16-37                    |                                           |                                                 |                                                                                                |
|                                                                              | Melanoma                 | 52                       |                                           |                                                 |                                                                                                |
| SSX2                                                                         | Myeloma                  | 12-23                    |                                           |                                                 |                                                                                                |
|                                                                              | Glioblastoma             | 29                       |                                           |                                                 |                                                                                                |
|                                                                              | Hepatocellular           | 9-47                     |                                           |                                                 |                                                                                                |
|                                                                              | Non-small cell lung      | 12-17                    |                                           |                                                 |                                                                                                |
|                                                                              | Melanoma                 | 0-35                     |                                           |                                                 |                                                                                                |
|                                                                              | Sarcoma                  | 50                       |                                           |                                                 |                                                                                                |
| MAGE-A2B                                                                     | Ependymoma               | 57                       |                                           |                                                 |                                                                                                |
|                                                                              | Medulloblastoma          | 18-60                    |                                           |                                                 |                                                                                                |
|                                                                              | Hepatocellular           | 35                       |                                           |                                                 |                                                                                                |
|                                                                              | Non-small cell lung      | 0-33                     |                                           |                                                 |                                                                                                |
|                                                                              | Melanoma                 | 41-70                    |                                           |                                                 |                                                                                                |
|                                                                              | Serous ovarian           | 21                       |                                           |                                                 |                                                                                                |
| Osteosarcoma                                                                 | 82                       |                          |                                           |                                                 |                                                                                                |
| Brachyury                                                                    | Lung                     | 41 <sup>16</sup>         | Thyroid, B-cells, testis <sup>16,17</sup> | Functionally important, many potential epitopes | MHC restricted, tissue restriction uncertain, frequency and intensity of positive cells varies |
| NY-BR-1                                                                      | Breast                   | 84 <sup>18</sup>         | Breast, testis <sup>18</sup>              | Many potential epitopes, cell surface           | Tissue restriction uncertain                                                                   |

|                                                                                                                                                                                                             |                     |                        |                                     | expression                                                                |                                                                   |
|-------------------------------------------------------------------------------------------------------------------------------------------------------------------------------------------------------------|---------------------|------------------------|-------------------------------------|---------------------------------------------------------------------------|-------------------------------------------------------------------|
| <b>Other tissue restricted antigens</b>                                                                                                                                                                     |                     |                        |                                     |                                                                           |                                                                   |
| CD19                                                                                                                                                                                                        | B-cell malignancies | 100                    | B cells                             | No MHC restriction                                                        | Normal tissue targeted, escape variants <sup>11</sup>             |
| BCMA                                                                                                                                                                                                        | Multiple myeloma    | 100                    | B cells, plasma cells <sup>19</sup> | No MHC restriction                                                        | Normal tissue targeted                                            |
| <b>Mutated proteins<sup>b</sup></b>                                                                                                                                                                         |                     |                        |                                     |                                                                           |                                                                   |
| KRAS G13D                                                                                                                                                                                                   | Colon               | 5                      | None                                | Functionally important                                                    | MHC restricted, few epitopes, generally low frequency of mutation |
| KRAS G12V                                                                                                                                                                                                   | Colon               | 7                      |                                     |                                                                           |                                                                   |
|                                                                                                                                                                                                             | Pancreas            | 18                     |                                     |                                                                           |                                                                   |
| KRAS G12R                                                                                                                                                                                                   | Pancreas            | 7                      |                                     |                                                                           |                                                                   |
| KRAS G12D                                                                                                                                                                                                   | Colon               | 11                     |                                     |                                                                           |                                                                   |
|                                                                                                                                                                                                             | Pancreas            | 29                     |                                     |                                                                           |                                                                   |
| KRAS G12C                                                                                                                                                                                                   | Lung                | 7                      |                                     |                                                                           |                                                                   |
| EGFRviii                                                                                                                                                                                                    | Glioblastoma        | 24-67 <sup>20,21</sup> | None                                | No MHC restriction, functionally important                                | Frequency and intensity of positive cells varies                  |
|                                                                                                                                                                                                             | Head and neck       | 42 <sup>22</sup>       |                                     |                                                                           |                                                                   |
| <b>Viral antigens</b>                                                                                                                                                                                       |                     |                        |                                     |                                                                           |                                                                   |
| HPV 16 E6<br>HPV 16 E7                                                                                                                                                                                      | Oropharynx          | 61 <sup>23</sup>       | None                                | Functionally important, constitutively expressed, many potential epitopes | MHC restricted                                                    |
|                                                                                                                                                                                                             | Cervix              | 53 <sup>24</sup>       |                                     |                                                                           |                                                                   |
|                                                                                                                                                                                                             | Vagina              | 50 <sup>25</sup>       |                                     |                                                                           |                                                                   |
|                                                                                                                                                                                                             | Vulva               | 30 <sup>25</sup>       |                                     |                                                                           |                                                                   |
|                                                                                                                                                                                                             | Anus                | 70 <sup>25</sup>       |                                     |                                                                           |                                                                   |
|                                                                                                                                                                                                             | Penis               | 28 <sup>26</sup>       |                                     |                                                                           |                                                                   |
| HPV18 E6<br>HPV18 E7                                                                                                                                                                                        | Cervix              | 13 <sup>24</sup>       |                                     |                                                                           |                                                                   |
| <sup>a</sup> Expression frequencies were extracted from the CTpedia database <sup>27</sup> . All studies had ≥ 10 specimens tested. Tissues with ≥ 20% positive samples in at least one study are included. |                     |                        |                                     |                                                                           |                                                                   |
| <sup>b</sup> Mutation frequencies are as reported by Warren and Holt <sup>28</sup> .                                                                                                                        |                     |                        |                                     |                                                                           |                                                                   |

1. Johnson, L. A. *et al.* Gene therapy with human and mouse T-cell receptors mediates cancer regression and targets normal tissues expressing cognate antigen. *Blood* **114**, 535–546 (2009).
2. Parkhurst, M. R. *et al.* T cells targeting carcinoembryonic antigen can mediate regression of metastatic colorectal cancer but induce severe transient colitis. *Mol. Ther.* **19**, 620–626 (2010).
3. Lamers, C. H. J. *et al.* Treatment of metastatic renal cell carcinoma with autologous T-lymphocytes genetically retargeted against carbonic anhydrase IX: first clinical experience. *J. Clin. Oncol.* **24**, e20–e22 (2006).
4. Lamers, C. H. *et al.* Treatment of metastatic renal cell carcinoma with CAIX CAR-engineered T cells: clinical evaluation and management of on-target toxicity. *Mol. Ther.* **21**, 904–912 (2013).
5. Morgan, R. A. *et al.* Case report of a serious adverse event following the administration of T cells transduced with a chimeric antigen receptor recognizing ERBB2. *Mol. Ther.* **18**, 843–851 (2010).
6. Morgan, R. A. *et al.* Cancer regression and neurological toxicity following anti-MAGE-A3 TCR gene therapy. *J. Immunother.* **36**, 133–151 (2013).
7. Linette, G. P. *et al.* Cardiovascular toxicity and titin cross-reactivity of affinity enhanced T cells in myeloma and melanoma. *Blood* (2013). doi:10.1182/blood-2013-03-490565
8. Kochenderfer, J. N. *et al.* B-cell depletion and remissions of malignancy along with cytokine-associated toxicity in a clinical trial of anti-CD19 chimeric-antigen-receptor-transduced T cells. *Blood* **119**, 2709–2720 (2012).
9. Porter, D. L., Levine, B. L., Kalos, M., Bagg, A. & June, C. H. Chimeric antigen receptor-modified T cells in chronic lymphoid leukemia. *N. Engl. J. Med.* **365**, 725–733 (2011).
10. Kalos, M. *et al.* T cells with chimeric antigen receptors have potent antitumor effects and can establish memory in patients with advanced leukemia. *Sci. Transl. Med.* **3**, 95ra73 (2011).
11. Grupp, S. A. *et al.* Chimeric antigen receptor-modified T cells for acute lymphoid leukemia. *N. Engl. J. Med.* **368**, 1509–1518 (2013).
12. Brentjens, R. J. *et al.* CD19-targeted T cells rapidly induce molecular remissions in adults with chemotherapy-refractory acute lymphoblastic leukemia. *Sci. Transl. Med.* **5**, 177ra38 (2013).
13. Pule, M. A. *et al.* Virus-specific T cells engineered to coexpress tumor-specific receptors: persistence and antitumor activity in individuals with neuroblastoma. *Nat. Med.* **14**, 1264–1270 (2008).
14. Robbins, P. F. *et al.* Tumor regression in patients with metastatic synovial cell sarcoma and melanoma using genetically engineered lymphocytes reactive with NY-ESO-1. *J. Clin. Oncol.* **29**, 917–924 (2011).
15. Hofmann, O. *et al.* Genome-wide analysis of cancer/testis gene expression. *Proc. Natl. Acad. Sci.* **105**, 20422–20427 (2008).
16. Roselli, M. *et al.* Brachyury, a driver of the epithelial-mesenchymal transition, is overexpressed in human lung tumors: an opportunity for novel interventions against lung cancer. *Clin. Cancer Res.* **18**, 3868–3879 (2012).
17. Palena, C. *et al.* The human T-box mesodermal transcription factor Brachyury is a candidate target for T-cell-mediated cancer immunotherapy. *Clin. Cancer Res.* **13**, 2471–2478 (2007).
18. Jäger, D. *et al.* Identification of a Tissue-specific Putative Transcription Factor in Breast Tissue by Serological Screening of a Breast Cancer Library. *Cancer Res.* **61**, 2055–2061 (2001).
19. Carpenter, R. O. *et al.* B-cell maturation antigen is a promising target for adoptive T-cell therapy of multiple myeloma. *Clin. Cancer Res.* (2013). doi:10.1158/1078-0432.CCR-12-2422

20. Humphrey, P. A. *et al.* Anti-synthetic peptide antibody reacting at the fusion junction of deletion-mutant epidermal growth factor receptors in human glioblastoma. *Proc. Natl. Acad. Sci.* **87**, 4207–4211 (1990).
21. Wong, A. J. *et al.* Structural alterations of the epidermal growth factor receptor gene in human gliomas. *Proc. Natl. Acad. Sci.* **89**, 2965–2969 (1992).
22. Sok, J. C. *et al.* Mutant Epidermal Growth Factor Receptor (EGFRvIII) Contributes to Head and Neck Cancer Growth and Resistance to EGFR Targeting. *Clin. Cancer Res.* **12**, 5064–5073 (2006).
23. Ang, K. K. *et al.* Human Papillomavirus and Survival of Patients with Oropharyngeal Cancer. *N. Engl. J. Med.* **363**, 24–35 (2010).
24. Wheeler, C. M. *et al.* Human papillomavirus genotype distributions: implications for vaccination and cancer screening in the United States. *J. Natl. Cancer Inst.* **101**, 475–487 (2009).
25. De Vuyst, H., Clifford, G. M., Nascimento, M. C., Madeleine, M. M. & Franceschi, S. Prevalence and type distribution of human papillomavirus in carcinoma and intraepithelial neoplasia of the vulva, vagina and anus: a meta-analysis. *Int. J. Cancer* **124**, 1626–1636 (2009).
26. Heideman, D. A. M. *et al.* Human papillomavirus-16 is the predominant type etiologically involved in penile squamous cell carcinoma. *J. Clin. Oncol.* **25**, 4550–4556 (2007).
27. CTpedia. at <<http://www.cta.lncc.br/index.php>>
28. Warren, R. L. & Holt, R. A. A census of predicted mutational epitopes suitable for immunologic cancer control. *Hum. Immunol.* **71**, 245–254 (2010).
